# Supplementary material for: Inflammatory response mediates cross-talk with immune function and reveals clinical features in acute myeloid leukemia
Source: Oxford University Press journal article supplement (doi:10.1042/bsr20220647), 2022-04-20
Supplement: bsr-2022-0647_supp.pdf [file bsr-2022-0647_supp.pdf]

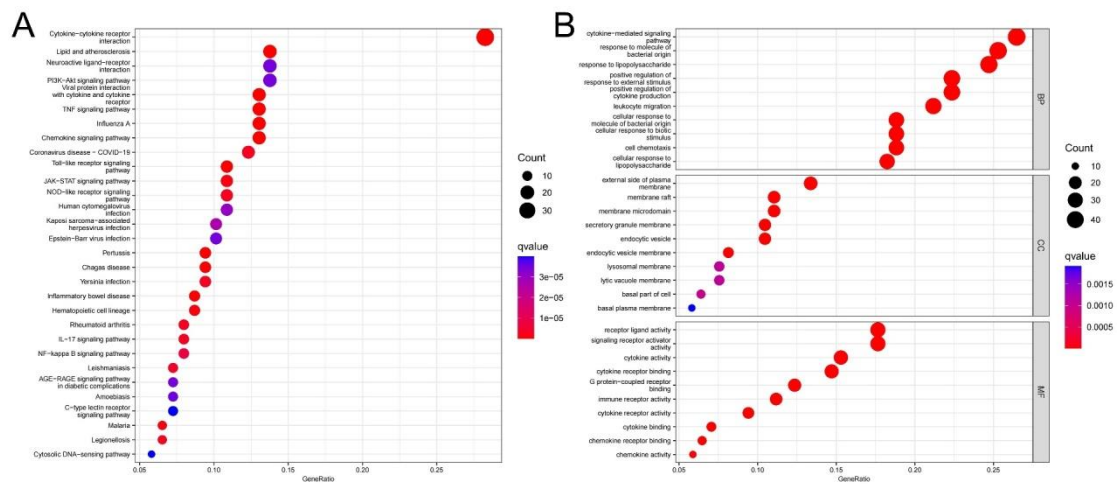

**Figure S1. Functional analysis of differentially expressed inflammatory response-related genes identified between AML samples and normal samples. (A) Kyoto Encyclopedia of Genes and Genomes pathway enrichment analysis. (D) Gene Ontology annotations.**
